# Supplementary material
Source: PubMed Central journal article supplement (PMC3801023)
Supplement: 1311948110_pnas.201311948SI.pdf [file 1311948110_pnas.201311948SI.pdf]

# Supporting Information

Guinn et al. 10.1073/pnas.1311948110

## SI Materials

**Determining  $\varepsilon$ - and  $\alpha$ -Values.** Values of  $\varepsilon_i$  (Eq. 2 and Table 1) for hydrocarbon surface were determined from solubility data. Heat capacity data for the transfer of aliphatic hydrocarbons and benzene from the pure liquid to water and accessible surface area (ASA) values for these hydrocarbons (see, for example, refs. 1–4) were analyzed as in Eq. 1 to obtain  $\varepsilon_i$  values for aliphatic and aromatic surfaces. Using least-squares regression analysis (R, version 2.14.1), we obtain  $\varepsilon_{\text{aliphatic}} = 0.35 \pm 0.1 \text{ cal}\cdot\text{mol}^{-1}\cdot\text{K}^{-1}\cdot\text{\AA}^{-2}$  and  $\varepsilon_{\text{aromatic}} = 0.25 \pm 0.1 \text{ cal}\cdot\text{mol}^{-1}\cdot\text{K}^{-1}\cdot\text{\AA}^{-2}$ . The value of  $\varepsilon_{\text{amide}}$  was previously determined by analysis of  $\Delta C_p^\circ$  for transfer of organic amides (2) using Eq. 1.  $\alpha$ -Values for interactions of urea and GuHCl with amide, aromatic C, and aliphatic C surface were determined from data for the interactions of these solutes with model compounds (5–7).

Because only two experimental quantities (one denaturant kinetic  $m$ -value and the corresponding activation  $\Delta C_p^\circ$ ) are available for folding and for unfolding, only composite  $\Delta\text{ASA}$

**Predicting  $\Delta\text{ASA}_{\text{amide}}$  and  $\Delta\text{ASA}_{\text{hydrocarbon}}$  from  $\Delta C_p^\circ$  and an  $m$ -Value.** To determine  $\Delta\text{ASA}_{\text{amide}}$  and  $\Delta\text{ASA}_{\text{hydrocarbon}}$  for proteins where  $\Delta C_p^\circ$  and either urea or GuHCl  $m$ -values were available, Eqs. 1 and 2 are rearranged to give the following:

$$\Delta\text{ASA}_x = \frac{\Delta C_p \times \alpha_y - m\text{-value} \times \varepsilon_y}{\varepsilon_x \times \alpha_y - \alpha_x \times \varepsilon_y} \quad [\text{S1}]$$

In Eq. S1, the subscript  $x$  refers to the surface type for which the ASA is being determined (amide or hydrocarbon), and  $y$  refers to the remaining surface type. The coefficients  $\alpha_x$  and  $\alpha_y$  are the  $\alpha$ -values for the solute for which the  $m$ -value used in Eq. S1 was determined.  $\Delta C_p$  and  $m$ -values from folding kinetic data give  $\Delta\text{ASA}$  for the U  $\rightarrow$  transition state (TS) transition, whereas values from unfolding data give  $\Delta\text{ASA}$  for the TS  $\rightarrow$  F transition.

From Eq. S1, we obtain the following expressions for  $\theta_{\text{ASA}}^{\text{TS}}$ , the degree of advancement of the TS, and  $\Omega^{\text{TS}}$ , the preferential burial of hydrocarbon surface:

$$\theta_{\text{ASA}}^{\text{U} \rightarrow \text{TS}} = \frac{\Delta\text{ASA}_{\text{U} \rightarrow \text{TS}}}{\Delta\text{ASA}_{\text{U} \rightarrow \text{F}}} = \frac{\Delta C_{p\text{U} \rightarrow \text{TS}}(\alpha_y - \alpha_x) - m\text{-value}_{\text{U} \rightarrow \text{TS}}(\varepsilon_y + \varepsilon_x)}{\Delta C_{p\text{U} \rightarrow \text{TS}}(\alpha_y - \alpha_x) - m\text{-value}_{\text{U} \rightarrow \text{TS}}(\varepsilon_y + \varepsilon_x) + \Delta C_{p\text{TS} \rightarrow \text{F}}(\alpha_y - \alpha_x) - m\text{-value}_{\text{TS} \rightarrow \text{F}}(\varepsilon_y + \varepsilon_x)} \quad [\text{S2}]$$

$$\Omega_z = \frac{r_z}{r_{\text{U} \rightarrow \text{F}}} = \frac{(\Delta C_{p_z} \times \alpha_y - m\text{-value}_z \times \varepsilon_y) / (\Delta C_{p_z} \times \alpha_x - m\text{-value}_z \times \varepsilon_x)}{(\Delta C_{p_z} \times \alpha_y - m\text{-value}_z \times \varepsilon_y + \Delta C_{p_b} \times \alpha_y - m\text{-value}_b \times \varepsilon_y) / (\Delta C_{p_z} \times \alpha_x - m\text{-value}_z \times \varepsilon_x + \Delta C_{p_b} \times \alpha_x - m\text{-value}_b \times \varepsilon_x)} \quad [\text{S3}]$$

values for hydrocarbon and amide surfaces are obtainable from these data. To determine composite  $\varepsilon$ - and  $\alpha$ -values for the hydrocarbon surface buried in protein folding, we used the average ratio of aliphatic:aromatic  $\Delta\text{ASA}$  values (9.3:1) obtained for unfolding of a large set of globular proteins (7). [For the 13 proteins analyzed here, the average ratio is 9.6. Although the range is large (4–27), this has little consequence for the composite  $\varepsilon$ - and  $\alpha$ -values because the aliphatic contribution is always dominant.] To determine composite  $\alpha$ -values for urea for the amide O and N surface buried in protein folding, we used the average ratio of amide O:amide N  $\Delta\text{ASA}$  values (2.4:1) obtained for unfolding of the same large set of globular proteins (7). [For the 13 proteins analyzed here, the average ratio is 2.7. Although the range is moderately large (2–5), its effect on the composite  $\alpha$ -value for urea is not outside of the propagated uncertainty.] Only composite values are available for the  $\alpha$ -coefficient for interaction of GuHCl with amide (O,N) ASA, and for the  $\varepsilon$ -coefficient for the contribution of amide (O,N) ASA to  $\Delta C_p^\circ$ . The GuHCl-amide (O,N)  $\alpha$ -value was obtained from studies with secondary amides, whereas the  $\Delta C_p^\circ$ -amide  $\varepsilon$ -value was obtained from studies with primary amides. Data are not currently available to refine these coefficients, and the agreement between predicted and structural values for the amide  $\Delta\text{ASA}$  of folding from U to F (Table 2 and Fig. 3) indicates the coefficients used are sufficiently accurate for this analysis.

In Eq. S3, the subscript  $x$  refers to hydrocarbon surface and  $y$  refers to amide surface. The subscript  $z$  refers to the transition for which  $\Omega$  is being determined (U  $\rightarrow$  TS or TS  $\rightarrow$  F) and  $b$  refers to the remaining transition.

For Eqs. S1–S3, uncertainty was determined using standard propagation methods for independent variables:

$$s_f^2 = \left( \frac{\partial F}{\partial \Delta C_{p\text{U} \rightarrow \text{TS}}} \right)^2 s_{\Delta C_{p\text{U} \rightarrow \text{TS}}}^2 + \left( \frac{\partial F}{\partial \Delta C_{p\text{TS} \rightarrow \text{F}}} \right)^2 s_{\Delta C_{p\text{TS} \rightarrow \text{F}}}^2 + \left( \frac{\partial F}{\partial m\text{-value}_{\text{U} \rightarrow \text{TS}}} \right)^2 s_{m\text{-value}_{\text{U} \rightarrow \text{TS}}}^2 + \left( \frac{\partial F}{\partial m\text{-value}_{\text{TS} \rightarrow \text{F}}} \right)^2 s_{m\text{-value}_{\text{TS} \rightarrow \text{F}}}^2 + \left( \frac{\partial F}{\partial \alpha_x} \right)^2 s_{\alpha_x}^2 + \left( \frac{\partial F}{\partial \alpha_y} \right)^2 s_{\alpha_y}^2 + \left( \frac{\partial F}{\partial \varepsilon_x} \right)^2 s_{\varepsilon_x}^2 + \left( \frac{\partial F}{\partial \varepsilon_y} \right)^2 s_{\varepsilon_y}^2, \quad [\text{S4}]$$

where  $F$  is the variable for which uncertainty is being determined. For each protein, Eq. S4 was solved using MATLAB to determine uncertainties in  $\Delta\text{ASA}$ ,  $\theta$  and  $\Omega$  values.

Uncertainties (Table 2) are typically larger for amide  $\Delta\text{ASA}$  (12–30%) than for hydrocarbon  $\Delta\text{ASA}$  (5–20%), and amide uncertainties are typically larger when determined from urea  $m$ -values than from GuHCl  $m$ -values (30% vs. 14%).

**Surface Area Calculations.** Values of  $\Delta\text{ASA}$  for unfolding, 1FKD, 1CQU, and 2CRO assuming an extended denatured state were obtained from Guinn et al. (7). Values of  $\Delta\text{ASA}$  for unfolding all other globular proteins and the model  $\beta$ -hairpin were calculated by building extended polypeptides and analyzing amount and composition of the ASA of this extended structure and the native structure by Surface Racer (9) using Richards van der Waals radii. Folded-state ASAs were calculated from structures in the Protein Data Bank (PDB) (10). Unfolded proteins and unfolded regions in folding intermediates and in TS were modeled by using the extended conformation of the backbone generated using Pymol ( $\varphi = 180$ ,  $\psi = 180$ ) and with statistically preferred side-chain rotamers chosen among common rotamers [with Coot (11)] to avoid steric clashes. To build models of possible intermediates with all of the native secondary structure ( $I_{ss}$ ) and more advanced models ( $I_{pre}$ , TS) we started with F and changed the disposition of secondary structural elements to minimize their interactions with each other by changing the backbone conformations of intervening regions. Two or more  $\alpha$ -helices or  $\beta$ -sheets that were connected by short hairpins were considered to be one secondary structural element and moved as a rigid body.

**Possible Sources of Systematic or Random Error in Predicted and Structural  $\Delta\text{ASA}$  Values in Fig. 1 and Fig. S1.** In Fig. 1A, the three proteins with the largest discrepancies between experimentally predicted and structural values of amide  $\Delta\text{ASA}_A$  are FKBP (1FKD), ACP-1 (2VH7), and 434 Cro (2CRO). In all three cases, the experimentally predicted value is larger in magnitude than the structural value. Because the structural value is calculated for an extended model of the unfolded polypeptide and therefore is the maximum magnitude of amide  $\Delta\text{ASA}_A$ , the model of the unfolded form is not the origin of these systematic discrepancies. In Fig. 1B, the four proteins with the largest deviation between structural and predicted values of  $\Delta\text{ASA}_H$  are T4L (1B61), PLB1 (1HZ6), Bs-Csp (1NMG), and Bc-Csp (1CO9). In all four cases, the experimentally predicted value is smaller in magnitude than the structural value. Although the existence of residual structure in the unfolded peptide could explain these discrepancies, such structure should also bury

amide ASA, but experimentally determined  $\Delta\text{ASA}_A$  values for these proteins do not deviate significantly from the line in Fig. 1A. Fig. S1 shows a similar level of agreement between the experimentally determined and structural values for the sum of  $\Delta\text{ASA}_A$  and  $\Delta\text{ASA}_H$  to that in Fig. 1B for  $\Delta\text{ASA}_H$ , as expected because  $\Delta\text{ASA}_H$  is the dominant term in the sum.

Another possible source of systematic uncertainty is from the analysis of heat capacity changes and denaturant  $m$ -values entirely in terms of hydrocarbon (aliphatic plus aromatic) and amide (N plus O) surface. This not only ignores potential contributions from other surface types (which account for  $\sim 10\%$  of the  $\Delta\text{ASA}$  in protein folding from an extended polypeptide) but also ignores any effect of systematic differences between proteins in the ratio of aliphatic to aromatic hydrocarbon and/or of amide N to amide O buried in folding to and from TS. This effect by itself does not appear capable of explaining the differences discussed above. To test the reproducibility of the extended-chain models of the unfolded state, in which the choice of side-chain rotamers is based on avoiding clash as described above, two such models for 2CRO and 1NMG were independently built and analyzed by Surface Racer. Values of hydrocarbon and amide ASA for the two models of each protein agree within 5%, indicating that ambiguity in the extended-chain model is also not a factor in these analyses.

**Amide Surface Buried in Forming Secondary Structure of Representative Proteins.** For 434 Cro (all  $\alpha$ -helix), the amide  $\Delta\text{ASA}$  per residue buried in  $\alpha$ -helix formation ( $20 \text{ \AA}^2\text{-res}^{-1}$ ) is almost the same as that calculated for the (AEAACA) $_n$   $\alpha$ -helical peptide ( $22 \text{ \AA}^2\text{-res}^{-1}$ ). For 1POH, which contains nearly equal amounts of  $\alpha$ -helix and  $\beta$ -sheet, the amide  $\Delta\text{ASA}$  per residue buried in secondary structure formation ( $17 \text{ res}^{-1}$ ) is halfway between the values calculated for (AEAACA) $_n$   $\alpha$ -helical peptide and PDB ID code 2EVQ  $\beta$ -hairpin. For Bs-Csp (all  $\beta$ -structure), the amide  $\Delta\text{ASA}$  per residue ( $17 \text{ \AA}^2\text{-res}^{-1}$ ) is somewhat larger than that of the PDB ID code 2EVQ  $\beta$ -hairpin ( $12 \text{ \AA}^2\text{-res}^{-1}$ ) because the Bs-Csp sheets involve both local and distant interactions.

1. Spolar RS, Record MT, Jr. (1994) Coupling of local folding to site-specific binding of proteins to DNA. *Science* 263(5148):777–784.
2. Spolar RS, Livingstone JR, Record MT, Jr. (1992) Use of liquid hydrocarbon and amide transfer data to estimate contributions to thermodynamic functions of protein folding from the removal of nonpolar and polar surface from water. *Biochemistry* 31(16):3947–3955.
3. Livingstone JR, Spolar RS, Record MT, Jr. (1991) Contribution to the thermodynamics of protein folding from the reduction in water-accessible nonpolar surface area. *Biochemistry* 30(17):4237–4244.
4. Privalov PL, Gill SJ (1988) Stability of protein structure and hydrophobic interaction. *Adv Protein Chem* 39:191–234.
5. Pegram LM, Record MT, Jr. (2008) Thermodynamic origin of Hofmeister ion effects. *J Phys Chem B* 112(31):9428–9436.
6. Pegram LM, et al. (2010) Why Hofmeister effects of many salts favor protein folding but not DNA helix formation. *Proc Natl Acad Sci USA* 107(17):7716–7721.
7. Guinn EJ, Pegram LM, Capp MW, Pollock MN, Record MT, Jr. (2011) Quantifying why urea is a protein denaturant, whereas glycine betaine is a protein stabilizer. *Proc Natl Acad Sci USA* 108(41):16932–16937.
8. Hong J, Capp MW, Saecker RM, Record MT, Jr. (2005) Use of urea and glycine betaine to quantify coupled folding and probe the burial of DNA phosphates in lac repressor-lac operator binding. *Biochemistry* 44(51):16896–16911.
9. Tsodikov OV, Record MT, Jr., Sergeev YV (2002) Novel computer program for fast exact calculation of accessible and molecular surface areas and average surface curvature. *J Comput Chem* 23(6):600–609.
10. Berman HM, et al. (2000) The Protein Data Bank. *Nucleic Acids Res* 28(1):235–242.
11. Emsley P, Lohkamp B, Scott WG, Cowtan K (2010) Features and development of Coot. *Acta Crystallogr D Biol Crystallogr* 66(Pt 4):486–501.

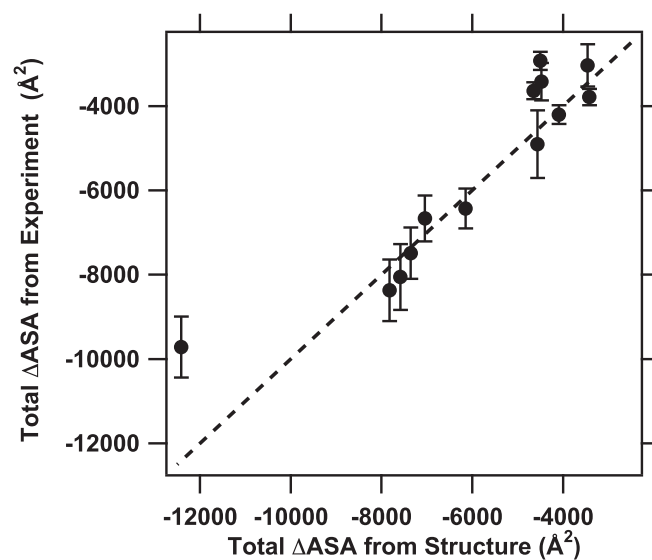

**Fig. S1.** Total (amide plus hydrocarbon)  $\Delta$ ASA values for the U  $\rightarrow$  F transition for 13 proteins from thermodynamic data (Eqs. 1 and 2) compared with values calculated from structural data (Table 2). The line represents equality of predicted and structural values.
